# Supplementary material for: Self-assembly of luminescent Zn–Ln (Ln = Sm and Nd) nanoclusters with a long-chain Schiff base ligand
Source: Royal Society of Chemistry journal article supplement (doi:10.1039/c7nj04967f), 2018-01-01
Supplement: c7nj04967f1.pdf [file c7nj04967f1.pdf]

## Supporting Information

### **Self-assembly of Luminescent Zn-Ln (Ln = Sm and Nd) Nanoclusters with a Long-chain Schiff Base Ligand**

Le Bo, Shiqing Wang, Desmond Schipper, Xiaoping Yang,\* Ting Zhu and Junbin Tao

#### **Contents**

|                                                                             |    |
|-----------------------------------------------------------------------------|----|
| 1. The <sup>1</sup> H NMR spectrum of the free ligand H <sub>2</sub> L..... | S2 |
| 2. Powder XRD patterns of clusters.....                                     | S3 |
| 3. MS(ESI) spectrum of <b>1</b> .....                                       | S4 |
| 4. The thermogravimetric analysis of nanoclusters.....                      | S5 |
| 5. Photophysical properties of the free ligand H <sub>2</sub> L.....        | S6 |
| 6. The emission lifetime of <b>2</b> .....                                  | S7 |
| 7. X-Ray Crystallography.....                                               | S8 |

## 1. The $^1\text{H}$ NMR spectra of the free ligands $\text{H}_2\text{L}$

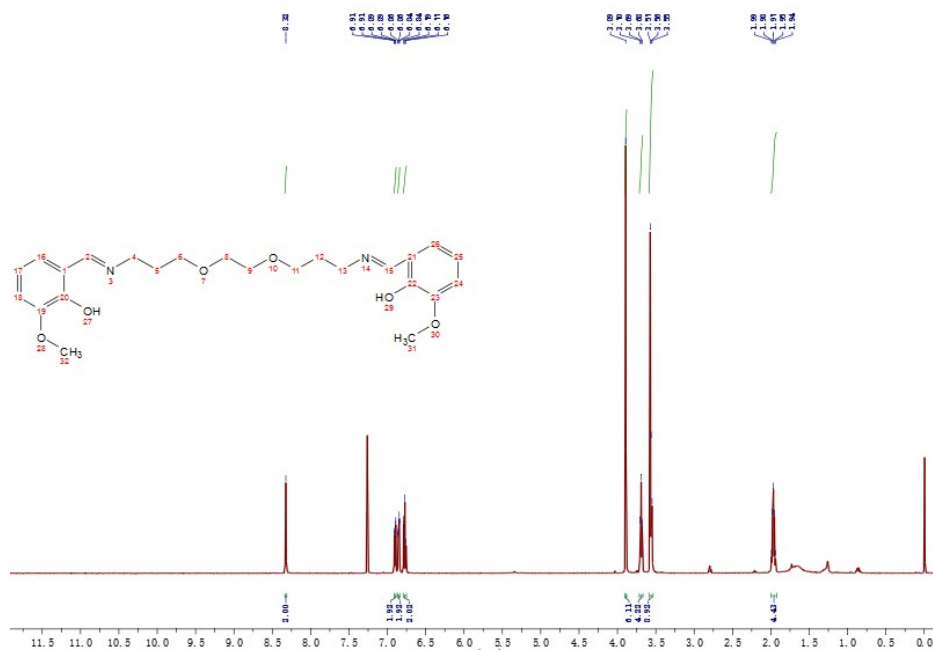

**Figure S1.** The  $^1\text{H}$  NMR spectrum of the free ligand  $\text{H}_2\text{L}$ .

## 2. Powder XRD patterns of clusters

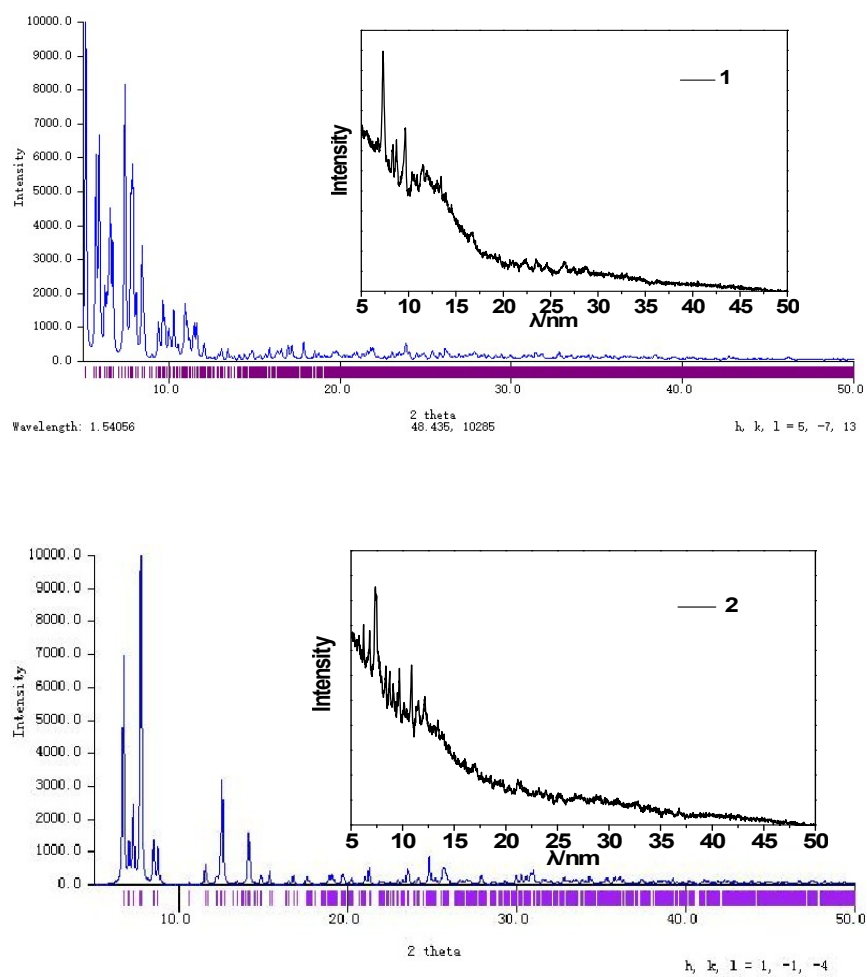

Figure S2. Powder XRD patterns of clusters.

### 3. MS(ESI) spectrum of 1

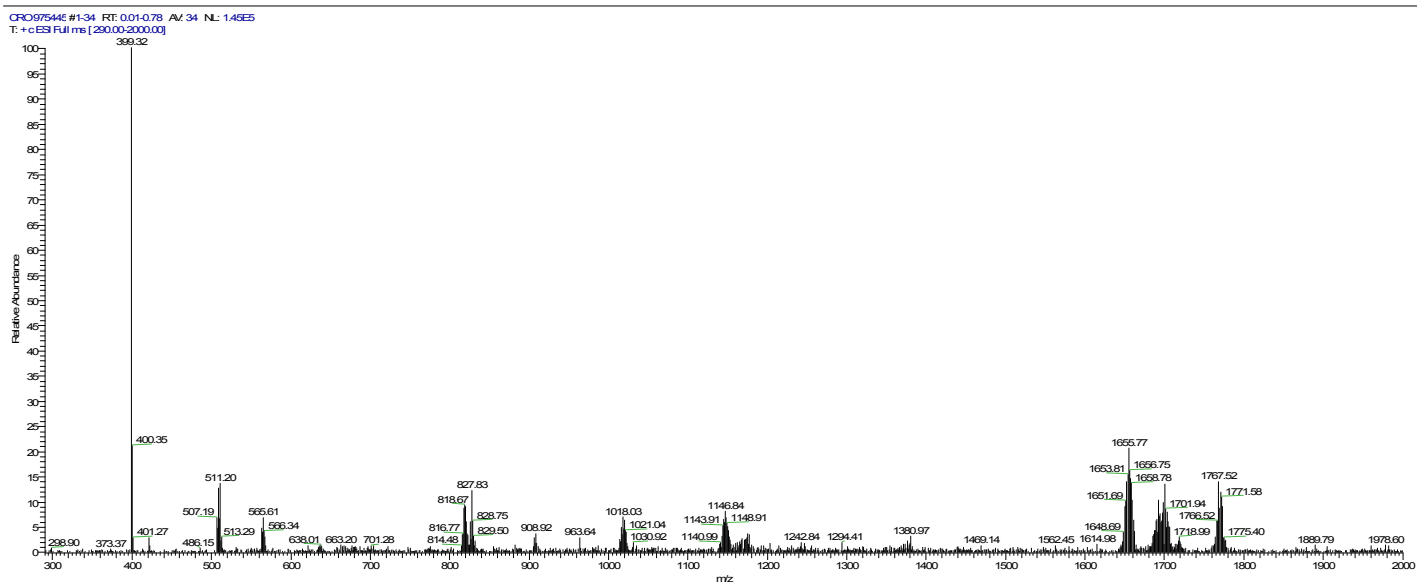

Figure S3. MS(ESI) spectrum of 1

#### 4. The thermogravimetric analysis of nanoclusters

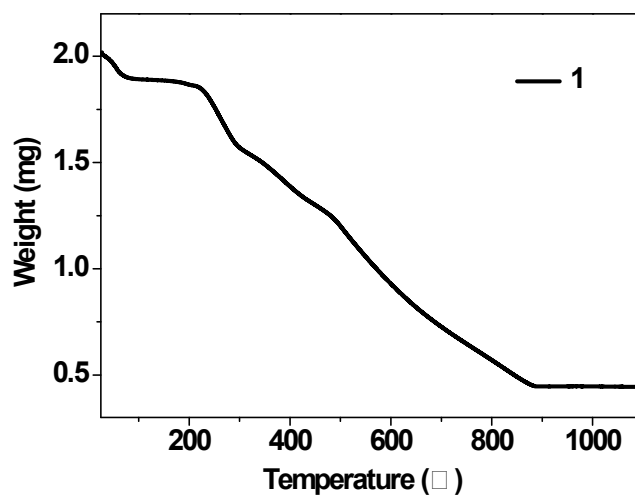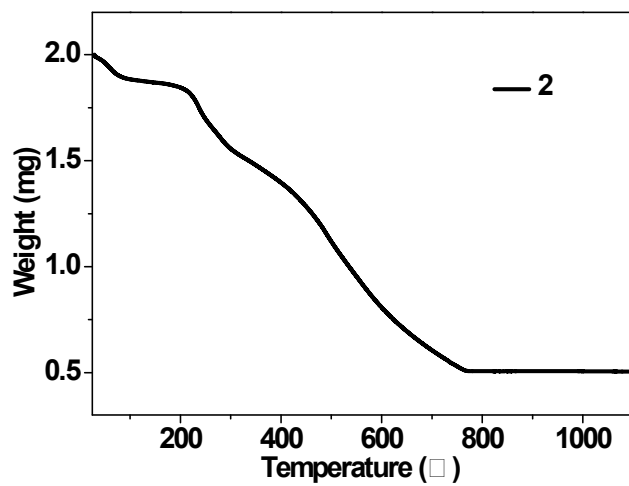

**Figure S4.** The thermogravimetric analysis of nanoclusters.

## 5. Photophysical properties of the free ligand H<sub>2</sub>L

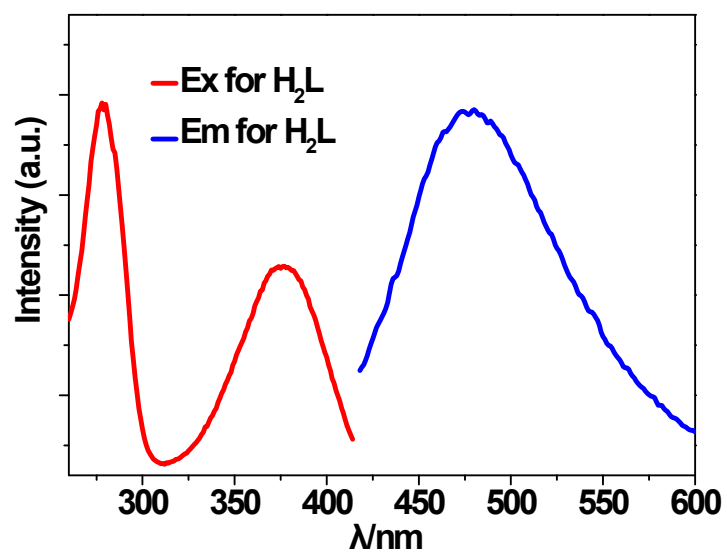

**Figure S5.** Excitation and emission spectra of the free ligand H<sub>2</sub>L in CH<sub>3</sub>CN.

## 6. The emission lifetime of **2**

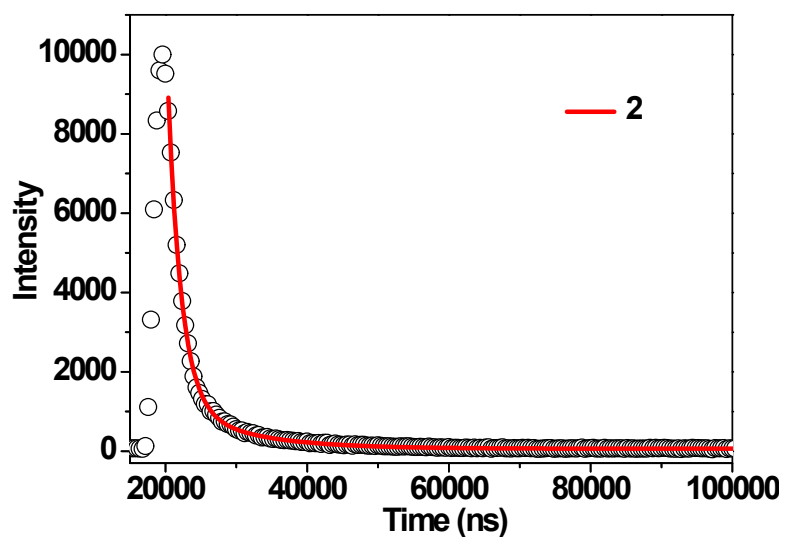

Figure S6. The emission lifetime of **2** in CH<sub>3</sub>CN.

## 7. X-Ray Crystallography

| Table | Clusters                                                                                                                                                                                                                                   | 1                                                                                                    | 2                                                                                                    | S1. |
|-------|--------------------------------------------------------------------------------------------------------------------------------------------------------------------------------------------------------------------------------------------|------------------------------------------------------------------------------------------------------|------------------------------------------------------------------------------------------------------|-----|
|       | Formula                                                                                                                                                                                                                                    | C <sub>208</sub> H <sub>267</sub> N <sub>16</sub><br>O <sub>68</sub> Zn <sub>8</sub> Sm <sub>4</sub> | C <sub>208</sub> H <sub>267</sub> N <sub>16</sub><br>O <sub>68</sub> Zn <sub>8</sub> Nd <sub>4</sub> |     |
|       | Fw                                                                                                                                                                                                                                         | 5135.70                                                                                              | 5111.26                                                                                              |     |
|       | Crystal system                                                                                                                                                                                                                             | Monoclinic                                                                                           | Monoclinic                                                                                           |     |
|       | Space group                                                                                                                                                                                                                                | C2/c                                                                                                 | C2/c                                                                                                 |     |
|       | <i>a</i> [Å]                                                                                                                                                                                                                               | 45.9782(10)                                                                                          | 45.6979(10)                                                                                          |     |
|       | <i>b</i> [Å]                                                                                                                                                                                                                               | 49.2984(10)                                                                                          | 48.8175(10)                                                                                          |     |
|       | <i>c</i> [Å]                                                                                                                                                                                                                               | 31.8403(5)                                                                                           | 32.0273(5)                                                                                           |     |
|       | $\alpha$ [deg]                                                                                                                                                                                                                             | 90                                                                                                   | 90                                                                                                   |     |
|       | $\beta$ [deg]                                                                                                                                                                                                                              | 113.3920(10)                                                                                         | 114.0460(10)                                                                                         |     |
|       | $\gamma$ [deg]                                                                                                                                                                                                                             | 90                                                                                                   | 90                                                                                                   |     |
|       | <i>V</i> / [Å <sup>3</sup> ]                                                                                                                                                                                                               | 66239(2)                                                                                             | 65248(2)                                                                                             |     |
|       | <i>d</i> / [g/cm <sup>3</sup> ]                                                                                                                                                                                                            | 1.030                                                                                                | 1.041                                                                                                |     |
|       | <i>Z</i>                                                                                                                                                                                                                                   | 8                                                                                                    | 8                                                                                                    |     |
|       | <i>T</i> [K]                                                                                                                                                                                                                               | 190                                                                                                  | 190                                                                                                  |     |
|       | F(000)                                                                                                                                                                                                                                     | 20984                                                                                                | 20920                                                                                                |     |
|       | $\mu$ , mm <sup>-1</sup>                                                                                                                                                                                                                   | 1.322                                                                                                | 1.258                                                                                                |     |
|       | $\theta$ rang, deg                                                                                                                                                                                                                         | 0.64-25.00                                                                                           | 0.64-25.00                                                                                           |     |
|       | reflns meads                                                                                                                                                                                                                               | 57409                                                                                                | 56023                                                                                                |     |
|       | reflns used                                                                                                                                                                                                                                | 57409                                                                                                | 56023                                                                                                |     |
|       | params                                                                                                                                                                                                                                     | 2701                                                                                                 | 2701                                                                                                 |     |
|       | R <sub>1</sub> <sup>a</sup> [ <i>I</i> > 2 $\sigma$ ( <i>I</i> )]                                                                                                                                                                          | 0.0662                                                                                               | 0.0742                                                                                               |     |
|       | wR <sub>2</sub> <sup>a</sup> [ <i>I</i> > 2 $\sigma$ ( <i>I</i> )]                                                                                                                                                                         | 0.1740                                                                                               | 0.1765                                                                                               |     |
|       | Quality of fit                                                                                                                                                                                                                             | 1.094                                                                                                | 0.988                                                                                                |     |
|       | <sup>a</sup> R <sub>1</sub> = $\Sigma F_o  -  F_c  / \Sigma F_o $ . wR <sub>2</sub> = $[\Sigma w[(F_o^2 - F_c^2)^2] / \Sigma [w(F_o^2)^2]]^{1/2}$ . $w = 1 / [\sigma^2(F_o^2) + (0.075P)^2]$ , where $P = [\max(F_o^2, 0) + 2F_c^2] / 3$ . |                                                                                                      |                                                                                                      |     |

Crystal data and structure refinement for **1** and **2**.



**Table S2.** Selected Bond Lengths (Å) and Angles (°) for **1**.

---

|             |          |            |          |
|-------------|----------|------------|----------|
| Sm(1)-O(50) | 2.430(5) | Sm(1)-O(2) | 2.432(5) |
|-------------|----------|------------|----------|

|             |          |                   |            |
|-------------|----------|-------------------|------------|
| Sm(1)-O(8)  | 2.439(4) | Zn(4)-N(12)       | 2.070(5)   |
| Sm(1)-O(51) | 2.444(5) | Zn(4)-N(16)       | 2.076(6)   |
| Sm(1)-O(29) | 2.447(5) | Zn(4)-O(32)       | 2.099(4)   |
| Sm(1)-O(38) | 2.455(5) | Zn(5)-O(60)       | 1.996(4)   |
| Sm(1)-O(30) | 2.716(5) | Zn(5)-O(20)       | 2.016(4)   |
| Sm(1)-O(7)  | 2.719(4) | Zn(5)-N(5)        | 2.047(4)   |
| Sm(1)-O(37) | 2.765(6) | Zn(5)-O(14)       | 2.084(4)   |
| Sm(1)-O(1)  | 2.782(5) | Zn(5)-N(7)        | 2.087(5)   |
| Sm(2)-O(32) | 2.406(4) | Zn(6)-O(57)       | 2.006(5)   |
| Sm(2)-O(44) | 2.421(4) | Zn(6)-O(35)       | 2.020(3)   |
| Sm(2)-O(11) | 2.430(4) | Zn(6)-N(15)       | 2.046(5)   |
| Sm(2)-O(5)  | 2.432(3) | Zn(6)-N(11)       | 2.070(5)   |
| Sm(2)-O(54) | 2.433(4) | Zn(6)-O(47)       | 2.074(4)   |
| Sm(2)-O(55) | 2.439(4) | Zn(7)-O(62)       | 1.976(5)   |
| Sm(2)-O(43) | 2.721(4) | Zn(7)-O(17)       | 2.041(4)   |
| Sm(2)-O(12) | 2.767(4) | Zn(7)-O(23)       | 2.055(4)   |
| Sm(2)-O(6)  | 2.770(4) | Zn(7)-N(8)        | 2.055(6)   |
| Sm(2)-O(31) | 2.773(4) | Zn(7)-N(6)        | 2.117(5)   |
| Sm(3)-O(35) | 2.400(4) | Zn(8)-O(63)       | 1.983(5)   |
| Sm(3)-O(47) | 2.406(3) | Zn(8)-O(26)       | 2.009(4)   |
| Sm(3)-O(20) | 2.408(4) | Zn(8)-N(9)        | 2.050(5)   |
| Sm(3)-O(59) | 2.415(4) | Zn(8)-N(13)       | 2.101(5)   |
| Sm(3)-O(14) | 2.428(3) | Zn(8)-O(41)       | 2.106(4)   |
| Sm(3)-O(58) | 2.441(4) | O(50)-Sm(1)-O(2)  | 113.66(15) |
| Sm(3)-O(36) | 2.746(4) | O(50)-Sm(1)-O(8)  | 143.32(17) |
| Sm(3)-O(19) | 2.758(4) | O(2)-Sm(1)-O(8)   | 63.30(15)  |
| Sm(3)-O(13) | 2.805(4) | O(50)-Sm(1)-O(51) | 70.41(16)  |
| Sm(3)-O(48) | 2.820(3) | O(2)-Sm(1)-O(51)  | 72.16(17)  |
| Sm(4)-O(41) | 2.397(4) | O(8)-Sm(1)-O(51)  | 74.42(15)  |
| Sm(4)-O(26) | 2.417(3) | O(50)-Sm(1)-O(29) | 70.75(14)  |
| Sm(4)-O(61) | 2.432(4) | O(2)-Sm(1)-O(29)  | 172.26(17) |
| Sm(4)-O(23) | 2.436(4) | O(8)-Sm(1)-O(29)  | 117.41(14) |
| Sm(4)-O(17) | 2.439(4) | O(51)-Sm(1)-O(29) | 115.58(16) |
| Sm(4)-O(64) | 2.457(5) | O(50)-Sm(1)-O(38) | 80.81(18)  |
| Sm(4)-O(42) | 2.716(4) | O(2)-Sm(1)-O(38)  | 110.75(18) |
| Sm(4)-O(25) | 2.748(4) | O(8)-Sm(1)-O(38)  | 135.66(16) |
| Sm(4)-O(18) | 2.768(4) | O(51)-Sm(1)-O(38) | 148.89(15) |
| Sm(4)-O(24) | 2.800(4) | O(29)-Sm(1)-O(38) | 62.95(18)  |
| Zn(1)-O(52) | 1.996(4) | O(50)-Sm(1)-O(30) | 84.06(16)  |
| Zn(1)-O(8)  | 2.025(4) | O(2)-Sm(1)-O(30)  | 126.00(16) |
| Zn(1)-O(2)  | 2.037(5) | O(8)-Sm(1)-O(30)  | 72.76(15)  |
| Zn(1)-N(1)  | 2.074(6) | O(51)-Sm(1)-O(30) | 66.90(14)  |
| Zn(1)-N(3)  | 2.084(6) | O(29)-Sm(1)-O(30) | 59.76(15)  |
| Zn(2)-O(49) | 1.999(5) | O(38)-Sm(1)-O(30) | 122.60(15) |
| Zn(2)-O(38) | 2.014(5) | O(50)-Sm(1)-O(7)  | 139.80(15) |
| Zn(2)-N(14) | 2.034(6) | O(2)-Sm(1)-O(7)   | 106.51(15) |
| Zn(2)-N(10) | 2.072(8) | O(8)-Sm(1)-O(7)   | 59.51(14)  |
| Zn(2)-O(29) | 2.118(5) | O(51)-Sm(1)-O(7)  | 126.02(16) |
| Zn(3)-O(56) | 1.993(4) | O(29)-Sm(1)-O(7)  | 69.17(14)  |
| Zn(3)-O(5)  | 2.028(4) | O(38)-Sm(1)-O(7)  | 83.84(16)  |
| Zn(3)-N(4)  | 2.058(5) | O(30)-Sm(1)-O(7)  | 73.48(15)  |
| Zn(3)-O(11) | 2.078(4) | O(50)-Sm(1)-O(37) | 131.89(18) |
| Zn(3)-N(2)  | 2.078(5) | O(2)-Sm(1)-O(37)  | 66.49(17)  |
| Zn(4)-O(53) | 1.975(4) | O(8)-Sm(1)-O(37)  | 82.46(17)  |
| Zn(4)-O(44) | 2.024(4) | O(51)-Sm(1)-O(37) | 138.31(16) |

|                   |            |                   |            |
|-------------------|------------|-------------------|------------|
| O(29)-Sm(1)-O(37) | 105.78(16) | O(43)-Sm(2)-O(31) | 132.87(11) |
| O(38)-Sm(1)-O(37) | 57.92(18)  | O(12)-Sm(2)-O(31) | 156.69(12) |
| O(30)-Sm(1)-O(37) | 137.38(14) | O(6)-Sm(2)-O(31)  | 70.47(13)  |
| O(7)-Sm(1)-O(37)  | 64.06(16)  | O(35)-Sm(3)-O(47) | 64.54(11)  |
| O(50)-Sm(1)-O(1)  | 69.01(17)  | O(35)-Sm(3)-O(20) | 131.06(14) |
| O(2)-Sm(1)-O(1)   | 58.86(15)  | O(47)-Sm(3)-O(20) | 113.50(12) |
| O(8)-Sm(1)-O(1)   | 122.08(15) | O(35)-Sm(3)-O(59) | 149.12(14) |
| O(51)-Sm(1)-O(1)  | 90.72(15)  | O(47)-Sm(3)-O(59) | 107.01(12) |
| O(29)-Sm(1)-O(1)  | 119.44(15) | O(20)-Sm(3)-O(59) | 79.82(14)  |
| O(38)-Sm(1)-O(1)  | 67.50(16)  | O(35)-Sm(3)-O(14) | 117.40(11) |
| O(30)-Sm(1)-O(1)  | 149.88(14) | O(47)-Sm(3)-O(14) | 177.70(13) |
| O(7)-Sm(1)-O(1)   | 136.30(17) | O(20)-Sm(3)-O(14) | 64.38(12)  |
| O(37)-Sm(1)-O(1)  | 72.73(16)  | O(59)-Sm(3)-O(14) | 71.99(12)  |
| O(32)-Sm(2)-O(44) | 64.23(15)  | O(35)-Sm(3)-O(58) | 76.81(14)  |
| O(32)-Sm(2)-O(11) | 175.55(12) | O(47)-Sm(3)-O(58) | 74.52(13)  |
| O(44)-Sm(2)-O(11) | 114.60(14) | O(20)-Sm(3)-O(58) | 152.11(14) |
| O(32)-Sm(2)-O(5)  | 113.60(12) | O(59)-Sm(3)-O(58) | 72.32(14)  |
| O(44)-Sm(2)-O(5)  | 133.89(13) | O(14)-Sm(3)-O(58) | 106.93(13) |
| O(11)-Sm(2)-O(5)  | 63.78(12)  | O(35)-Sm(3)-O(36) | 59.54(12)  |
| O(32)-Sm(2)-O(54) | 72.63(13)  | O(47)-Sm(3)-O(36) | 111.04(12) |
| O(44)-Sm(2)-O(54) | 77.92(14)  | O(20)-Sm(3)-O(36) | 79.67(13)  |
| O(11)-Sm(2)-O(54) | 111.56(13) | O(59)-Sm(3)-O(36) | 141.45(11) |
| O(5)-Sm(2)-O(54)  | 147.92(15) | O(14)-Sm(3)-O(36) | 69.76(12)  |
| O(32)-Sm(2)-O(55) | 113.70(15) | O(58)-Sm(3)-O(36) | 123.83(13) |
| O(44)-Sm(2)-O(55) | 150.17(12) | O(35)-Sm(3)-O(19) | 77.86(13)  |
| O(11)-Sm(2)-O(55) | 69.59(14)  | O(47)-Sm(3)-O(19) | 68.38(13)  |
| O(5)-Sm(2)-O(55)  | 75.48(12)  | O(20)-Sm(3)-O(19) | 59.23(13)  |
| O(54)-Sm(2)-O(55) | 73.49(13)  | O(59)-Sm(3)-O(19) | 128.62(13) |
| O(32)-Sm(2)-O(43) | 107.05(13) | O(14)-Sm(3)-O(19) | 110.51(12) |
| O(44)-Sm(2)-O(43) | 59.48(13)  | O(58)-Sm(3)-O(19) | 141.36(12) |
| O(11)-Sm(2)-O(43) | 69.25(13)  | O(36)-Sm(3)-O(19) | 63.46(12)  |
| O(5)-Sm(2)-O(43)  | 80.20(13)  | O(35)-Sm(3)-O(13) | 69.35(12)  |
| O(54)-Sm(2)-O(43) | 129.68(14) | O(47)-Sm(3)-O(13) | 124.51(12) |
| O(55)-Sm(2)-O(43) | 138.19(13) | O(20)-Sm(3)-O(13) | 119.69(11) |
| O(32)-Sm(2)-O(12) | 123.58(12) | O(59)-Sm(3)-O(13) | 96.91(13)  |
| O(44)-Sm(2)-O(12) | 67.94(13)  | O(14)-Sm(3)-O(13) | 57.78(12)  |
| O(11)-Sm(2)-O(12) | 58.08(12)  | O(58)-Sm(3)-O(13) | 66.25(12)  |
| O(5)-Sm(2)-O(12)  | 120.77(13) | O(36)-Sm(3)-O(13) | 66.32(13)  |
| O(54)-Sm(2)-O(12) | 69.70(14)  | O(19)-Sm(3)-O(13) | 128.92(12) |
| O(55)-Sm(2)-O(12) | 93.89(13)  | O(35)-Sm(3)-O(48) | 121.49(11) |
| O(43)-Sm(2)-O(12) | 70.24(12)  | O(47)-Sm(3)-O(48) | 58.55(11)  |
| O(32)-Sm(2)-O(6)  | 66.92(12)  | O(20)-Sm(3)-O(48) | 66.91(11)  |
| O(44)-Sm(2)-O(6)  | 82.17(12)  | O(59)-Sm(3)-O(48) | 65.66(12)  |
| O(11)-Sm(2)-O(6)  | 108.80(12) | O(14)-Sm(3)-O(48) | 119.26(11) |
| O(5)-Sm(2)-O(6)   | 58.69(12)  | O(58)-Sm(3)-O(48) | 99.49(12)  |
| O(54)-Sm(2)-O(6)  | 139.45(13) | O(36)-Sm(3)-O(48) | 132.20(13) |
| O(55)-Sm(2)-O(6)  | 125.80(13) | O(19)-Sm(3)-O(48) | 70.18(12)  |
| O(43)-Sm(2)-O(6)  | 63.16(13)  | O(13)-Sm(3)-O(48) | 160.89(13) |
| O(12)-Sm(2)-O(6)  | 132.82(13) | O(41)-Sm(4)-O(26) | 63.36(12)  |
| O(32)-Sm(2)-O(31) | 59.09(14)  | O(41)-Sm(4)-O(61) | 117.11(14) |
| O(44)-Sm(2)-O(31) | 122.88(13) | O(26)-Sm(4)-O(61) | 143.50(16) |
| O(11)-Sm(2)-O(31) | 121.34(13) | O(41)-Sm(4)-O(23) | 169.85(15) |
| O(5)-Sm(2)-O(31)  | 68.72(13)  | O(26)-Sm(4)-O(23) | 111.15(12) |
| O(54)-Sm(2)-O(31) | 91.48(14)  | O(61)-Sm(4)-O(23) | 72.57(15)  |
| O(55)-Sm(2)-O(31) | 66.81(13)  | O(41)-Sm(4)-O(17) | 114.03(14) |

|                   |            |                   |            |
|-------------------|------------|-------------------|------------|
| O(26)-Sm(4)-O(17) | 139.71(14) | O(38)-Zn(2)-O(29) | 76.5(2)    |
| O(61)-Sm(4)-O(17) | 75.82(16)  | N(14)-Zn(2)-O(29) | 86.4(2)    |
| O(23)-Sm(4)-O(17) | 63.92(14)  | N(10)-Zn(2)-O(29) | 164.6(3)   |
| O(41)-Sm(4)-O(64) | 72.26(16)  | O(56)-Zn(3)-O(5)  | 118.59(17) |
| O(26)-Sm(4)-O(64) | 76.17(14)  | O(56)-Zn(3)-N(4)  | 117.30(17) |
| O(61)-Sm(4)-O(64) | 70.27(16)  | O(5)-Zn(3)-N(4)   | 121.86(18) |
| O(23)-Sm(4)-O(64) | 115.64(17) | O(56)-Zn(3)-O(11) | 90.10(15)  |
| O(17)-Sm(4)-O(64) | 143.70(14) | O(5)-Zn(3)-O(11)  | 77.42(15)  |
| O(41)-Sm(4)-O(42) | 59.71(12)  | N(4)-Zn(3)-O(11)  | 87.81(18)  |
| O(26)-Sm(4)-O(42) | 122.98(12) | O(56)-Zn(3)-N(2)  | 98.38(18)  |
| O(61)-Sm(4)-O(42) | 67.90(13)  | O(5)-Zn(3)-N(2)   | 87.27(17)  |
| O(23)-Sm(4)-O(42) | 125.55(12) | N(4)-Zn(3)-N(2)   | 99.46(19)  |
| O(17)-Sm(4)-O(42) | 71.11(13)  | O(11)-Zn(3)-N(2)  | 164.65(17) |
| O(64)-Sm(4)-O(42) | 84.28(14)  | O(53)-Zn(4)-O(44) | 114.76(17) |
| O(41)-Sm(4)-O(25) | 102.28(13) | O(53)-Zn(4)-N(12) | 118.48(19) |
| O(26)-Sm(4)-O(25) | 58.94(13)  | O(44)-Zn(4)-N(12) | 124.05(17) |
| O(61)-Sm(4)-O(25) | 140.37(14) | O(53)-Zn(4)-N(16) | 99.41(19)  |
| O(23)-Sm(4)-O(25) | 67.87(13)  | O(44)-Zn(4)-N(16) | 86.93(19)  |
| O(17)-Sm(4)-O(25) | 84.77(13)  | N(12)-Zn(4)-N(16) | 100.1(2)   |
| O(64)-Sm(4)-O(25) | 130.27(13) | O(53)-Zn(4)-O(32) | 91.89(17)  |
| O(42)-Sm(4)-O(25) | 136.88(14) | O(44)-Zn(4)-O(32) | 76.97(16)  |
| O(41)-Sm(4)-O(18) | 68.52(14)  | N(12)-Zn(4)-O(32) | 85.22(19)  |
| O(26)-Sm(4)-O(18) | 86.55(13)  | N(16)-Zn(4)-O(32) | 163.2(2)   |
| O(61)-Sm(4)-O(18) | 128.98(14) | O(60)-Zn(5)-O(20) | 115.28(15) |
| O(23)-Sm(4)-O(18) | 103.37(15) | O(60)-Zn(5)-N(5)  | 120.34(17) |
| O(17)-Sm(4)-O(18) | 58.69(13)  | O(20)-Zn(5)-N(5)  | 123.37(17) |
| O(64)-Sm(4)-O(18) | 140.78(15) | O(60)-Zn(5)-O(14) | 93.51(16)  |
| O(42)-Sm(4)-O(18) | 76.03(12)  | O(20)-Zn(5)-O(14) | 77.84(14)  |
| O(25)-Sm(4)-O(18) | 60.87(12)  | N(5)-Zn(5)-O(14)  | 88.82(16)  |
| O(41)-Sm(4)-O(24) | 122.34(13) | O(60)-Zn(5)-N(7)  | 93.33(18)  |
| O(26)-Sm(4)-O(24) | 66.63(13)  | O(20)-Zn(5)-N(7)  | 86.96(17)  |
| O(61)-Sm(4)-O(24) | 88.16(14)  | N(5)-Zn(5)-N(7)   | 99.38(18)  |
| O(23)-Sm(4)-O(24) | 58.54(14)  | O(14)-Zn(5)-N(7)  | 164.79(16) |
| O(17)-Sm(4)-O(24) | 122.45(14) | O(57)-Zn(6)-O(35) | 114.29(16) |
| O(64)-Sm(4)-O(24) | 69.60(15)  | O(57)-Zn(6)-N(15) | 119.30(17) |
| O(42)-Sm(4)-O(24) | 149.56(14) | O(35)-Zn(6)-N(15) | 125.13(19) |
| O(25)-Sm(4)-O(24) | 73.54(13)  | O(57)-Zn(6)-N(11) | 93.73(19)  |
| O(18)-Sm(4)-O(24) | 134.32(12) | O(35)-Zn(6)-N(11) | 86.18(16)  |
| O(52)-Zn(1)-O(8)  | 110.05(18) | N(15)-Zn(6)-N(11) | 100.96(19) |
| O(52)-Zn(1)-O(2)  | 95.70(19)  | O(57)-Zn(6)-O(47) | 93.88(16)  |
| O(8)-Zn(1)-O(2)   | 77.98(18)  | O(35)-Zn(6)-O(47) | 77.61(14)  |
| O(52)-Zn(1)-N(1)  | 123.86(18) | N(15)-Zn(6)-O(47) | 87.74(17)  |
| O(8)-Zn(1)-N(1)   | 125.3(2)   | N(11)-Zn(6)-O(47) | 163.75(16) |
| O(2)-Zn(1)-N(1)   | 87.5(2)    | O(62)-Zn(7)-O(17) | 111.8(2)   |
| O(52)-Zn(1)-N(3)  | 93.7(2)    | O(62)-Zn(7)-O(23) | 96.7(2)    |
| O(8)-Zn(1)-N(3)   | 86.52(19)  | O(17)-Zn(7)-O(23) | 78.11(16)  |
| O(2)-Zn(1)-N(3)   | 163.89(19) | O(62)-Zn(7)-N(8)  | 117.1(2)   |
| N(1)-Zn(1)-N(3)   | 98.1(2)    | O(17)-Zn(7)-N(8)  | 130.2(2)   |
| O(49)-Zn(2)-O(38) | 118.7(2)   | O(23)-Zn(7)-N(8)  | 87.25(19)  |
| O(49)-Zn(2)-N(14) | 104.0(2)   | O(62)-Zn(7)-N(6)  | 94.1(2)    |
| O(38)-Zn(2)-N(14) | 133.9(2)   | O(17)-Zn(7)-N(6)  | 85.89(19)  |
| O(49)-Zn(2)-N(10) | 99.3(2)    | O(23)-Zn(7)-N(6)  | 163.1(2)   |
| O(38)-Zn(2)-N(10) | 88.6(3)    | N(8)-Zn(7)-N(6)   | 99.2(2)    |
| N(14)-Zn(2)-N(10) | 101.6(3)   | O(63)-Zn(8)-O(26) | 117.95(19) |
| O(49)-Zn(2)-O(29) | 91.40(19)  | O(63)-Zn(8)-N(9)  | 111.1(2)   |

|                   |            |                   |            |
|-------------------|------------|-------------------|------------|
| O(26)-Zn(8)-N(9)  | 127.83(19) | O(63)-Zn(8)-O(41) | 93.62(18)  |
| O(63)-Zn(8)-N(13) | 98.8(2)    | O(26)-Zn(8)-O(41) | 75.76(15)  |
| O(26)-Zn(8)-N(13) | 87.07(18)  | N(9)-Zn(8)-O(41)  | 84.87(17)  |
| N(9)-Zn(8)-N(13)  | 102.30(19) | N(13)-Zn(8)-O(41) | 162.15(19) |

**Table S3.** Selected Bond Lengths (Å) and Angles (°) for **2**.

|             |           |                   |           |
|-------------|-----------|-------------------|-----------|
| Nd(1)-O(2)  | 2.358(7)  | Zn(1)-O(2)        | 2.039(8)  |
| Nd(1)-O(38) | 2.360(10) | Zn(1)-N(3)        | 2.069(9)  |
| Nd(1)-O(8)  | 2.368(7)  | Zn(2)-O(49)       | 1.959(8)  |
| Nd(1)-O(50) | 2.371(8)  | Zn(2)-O(38)       | 2.046(9)  |
| Nd(1)-O(29) | 2.380(8)  | Zn(2)-N(14)       | 2.047(11) |
| Nd(1)-O(51) | 2.383(9)  | Zn(2)-N(10)       | 2.052(11) |
| Nd(1)-O(7)  | 2.698(6)  | Zn(2)-O(29)       | 2.111(8)  |
| Nd(1)-O(30) | 2.699(9)  | Zn(3)-O(56)       | 1.990(6)  |
| Nd(1)-O(37) | 2.721(9)  | Zn(3)-O(5)        | 2.009(6)  |
| Nd(1)-O(1)  | 2.802(9)  | Zn(3)-N(4)        | 2.024(10) |
| Nd(2)-O(32) | 2.320(7)  | Zn(3)-N(2)        | 2.069(7)  |
| Nd(2)-O(44) | 2.335(7)  | Zn(3)-O(11)       | 2.080(7)  |
| Nd(2)-O(55) | 2.353(7)  | Zn(4)-O(53)       | 1.965(7)  |
| Nd(2)-O(11) | 2.360(7)  | Zn(4)-O(44)       | 2.005(7)  |
| Nd(2)-O(5)  | 2.377(5)  | Zn(4)-N(12)       | 2.054(8)  |
| Nd(2)-O(54) | 2.383(6)  | Zn(4)-N(16)       | 2.074(9)  |
| Nd(2)-O(43) | 2.714(7)  | Zn(4)-O(32)       | 2.099(7)  |
| Nd(2)-O(31) | 2.769(8)  | Zn(5)-O(60)       | 1.968(7)  |
| Nd(2)-O(6)  | 2.773(6)  | Zn(5)-N(5)        | 2.017(7)  |
| Nd(2)-O(12) | 2.779(7)  | Zn(5)-O(20)       | 2.056(6)  |
| Nd(3)-O(35) | 2.319(6)  | Zn(5)-O(14)       | 2.061(6)  |
| Nd(3)-O(20) | 2.329(7)  | Zn(5)-N(7)        | 2.101(9)  |
| Nd(3)-O(58) | 2.354(7)  | Zn(6)-O(57)       | 1.996(7)  |
| Nd(3)-O(47) | 2.369(5)  | Zn(6)-N(15)       | 2.014(7)  |
| Nd(3)-O(59) | 2.374(7)  | Zn(6)-O(35)       | 2.024(5)  |
| Nd(3)-O(14) | 2.396(5)  | Zn(6)-O(47)       | 2.052(6)  |
| Nd(3)-O(36) | 2.724(6)  | Zn(6)-N(11)       | 2.085(8)  |
| Nd(3)-O(19) | 2.742(7)  | Zn(7)-O(62)       | 1.967(9)  |
| Nd(3)-O(13) | 2.829(6)  | Zn(7)-O(23)       | 2.031(6)  |
| Nd(3)-O(48) | 2.886(5)  | Zn(7)-N(8)        | 2.036(9)  |
| Nd(4)-O(41) | 2.324(6)  | Zn(7)-O(17)       | 2.061(7)  |
| Nd(4)-O(26) | 2.345(5)  | Zn(7)-N(6)        | 2.120(9)  |
| Nd(4)-O(61) | 2.361(7)  | Zn(8)-O(63)       | 1.968(8)  |
| Nd(4)-O(23) | 2.367(7)  | Zn(8)-O(26)       | 1.988(6)  |
| Nd(4)-O(64) | 2.381(9)  | Zn(8)-N(9)        | 2.043(8)  |
| Nd(4)-O(17) | 2.386(8)  | Zn(8)-N(13)       | 2.077(8)  |
| Nd(4)-O(42) | 2.731(6)  | Zn(8)-O(41)       | 2.101(6)  |
| Nd(4)-O(18) | 2.732(7)  | O(2)-Nd(1)-O(38)  | 109.2(3)  |
| Nd(4)-O(25) | 2.751(6)  | O(2)-Nd(1)-O(8)   | 64.2(2)   |
| Nd(4)-O(24) | 2.841(8)  | O(38)-Nd(1)-O(8)  | 135.5(3)  |
| Zn(1)-O(52) | 1.997(7)  | O(2)-Nd(1)-O(50)  | 111.5(2)  |
| Zn(1)-N(1)  | 2.003(10) | O(38)-Nd(1)-O(50) | 80.4(3)   |
| Zn(1)-O(8)  | 2.012(7)  | O(8)-Nd(1)-O(50)  | 144.0(3)  |

|                   |           |                   |            |
|-------------------|-----------|-------------------|------------|
| O(2)-Nd(1)-O(29)  | 173.6(3)  | O(44)-Nd(2)-O(43) | 60.7(2)    |
| O(38)-Nd(1)-O(29) | 65.4(3)   | O(55)-Nd(2)-O(43) | 138.3(2)   |
| O(8)-Nd(1)-O(29)  | 116.7(2)  | O(11)-Nd(2)-O(43) | 68.2(2)    |
| O(50)-Nd(1)-O(29) | 71.7(2)   | O(5)-Nd(2)-O(43)  | 79.1(2)    |
| O(2)-Nd(1)-O(51)  | 72.4(3)   | O(54)-Nd(2)-O(43) | 130.9(2)   |
| O(38)-Nd(1)-O(51) | 147.9(2)  | O(32)-Nd(2)-O(31) | 59.3(3)    |
| O(8)-Nd(1)-O(51)  | 75.2(2)   | O(44)-Nd(2)-O(31) | 123.6(2)   |
| O(50)-Nd(1)-O(51) | 69.9(3)   | O(55)-Nd(2)-O(31) | 66.1(2)    |
| O(29)-Nd(1)-O(51) | 113.9(3)  | O(11)-Nd(2)-O(31) | 121.9(3)   |
| O(2)-Nd(1)-O(7)   | 108.5(2)  | O(5)-Nd(2)-O(31)  | 68.5(2)    |
| O(38)-Nd(1)-O(7)  | 83.1(3)   | O(54)-Nd(2)-O(31) | 91.4(2)    |
| O(8)-Nd(1)-O(7)   | 61.0(2)   | O(43)-Nd(2)-O(31) | 132.79(18) |
| O(50)-Nd(1)-O(7)  | 139.7(2)  | O(32)-Nd(2)-O(6)  | 65.9(2)    |
| O(29)-Nd(1)-O(7)  | 68.1(2)   | O(44)-Nd(2)-O(6)  | 81.45(19)  |
| O(51)-Nd(1)-O(7)  | 127.7(3)  | O(55)-Nd(2)-O(6)  | 127.4(2)   |
| O(2)-Nd(1)-O(30)  | 124.6(3)  | O(11)-Nd(2)-O(6)  | 110.01(19) |
| O(38)-Nd(1)-O(30) | 125.3(3)  | O(5)-Nd(2)-O(6)   | 59.47(19)  |
| O(8)-Nd(1)-O(30)  | 70.2(3)   | O(54)-Nd(2)-O(6)  | 139.4(2)   |
| O(50)-Nd(1)-O(30) | 88.0(3)   | O(43)-Nd(2)-O(6)  | 62.74(19)  |
| O(29)-Nd(1)-O(30) | 60.2(3)   | O(31)-Nd(2)-O(6)  | 71.3(2)    |
| O(51)-Nd(1)-O(30) | 66.8(3)   | O(32)-Nd(2)-O(12) | 122.8(2)   |
| O(7)-Nd(1)-O(30)  | 72.3(2)   | O(44)-Nd(2)-O(12) | 67.1(2)    |
| O(2)-Nd(1)-O(37)  | 65.3(3)   | O(55)-Nd(2)-O(12) | 93.7(2)    |
| O(38)-Nd(1)-O(37) | 58.8(3)   | O(11)-Nd(2)-O(12) | 58.3(2)    |
| O(8)-Nd(1)-O(37)  | 81.1(3)   | O(5)-Nd(2)-O(12)  | 122.3(2)   |
| O(50)-Nd(1)-O(37) | 131.7(3)  | O(54)-Nd(2)-O(12) | 68.1(2)    |
| O(29)-Nd(1)-O(37) | 108.3(3)  | O(43)-Nd(2)-O(12) | 71.59(18)  |
| O(51)-Nd(1)-O(37) | 137.3(3)  | O(31)-Nd(2)-O(12) | 155.42(19) |
| O(7)-Nd(1)-O(37)  | 64.2(2)   | O(6)-Nd(2)-O(12)  | 133.1(2)   |
| O(30)-Nd(1)-O(37) | 135.6(2)  | O(35)-Nd(3)-O(20) | 130.4(2)   |
| O(2)-Nd(1)-O(1)   | 58.9(3)   | O(35)-Nd(3)-O(58) | 77.4(2)    |
| O(38)-Nd(1)-O(1)  | 66.5(2)   | O(20)-Nd(3)-O(58) | 152.1(2)   |
| O(8)-Nd(1)-O(1)   | 123.1(3)  | O(35)-Nd(3)-O(47) | 65.69(18)  |
| O(50)-Nd(1)-O(1)  | 66.1(3)   | O(20)-Nd(3)-O(47) | 111.9(2)   |
| O(29)-Nd(1)-O(1)  | 119.4(3)  | O(58)-Nd(3)-O(47) | 74.1(2)    |
| O(51)-Nd(1)-O(1)  | 89.9(2)   | O(35)-Nd(3)-O(59) | 149.4(2)   |
| O(7)-Nd(1)-O(1)   | 137.0(3)  | O(20)-Nd(3)-O(59) | 80.2(2)    |
| O(30)-Nd(1)-O(1)  | 150.4(2)  | O(58)-Nd(3)-O(59) | 72.0(2)    |
| O(37)-Nd(1)-O(1)  | 74.0(3)   | O(47)-Nd(3)-O(59) | 105.53(19) |
| O(32)-Nd(2)-O(44) | 64.6(3)   | O(35)-Nd(3)-O(14) | 117.33(17) |
| O(32)-Nd(2)-O(55) | 112.9(3)  | O(20)-Nd(3)-O(14) | 66.2(2)    |
| O(44)-Nd(2)-O(55) | 148.9(2)  | O(58)-Nd(3)-O(14) | 106.3(2)   |
| O(32)-Nd(2)-O(11) | 175.5(2)  | O(47)-Nd(3)-O(14) | 176.97(18) |
| O(44)-Nd(2)-O(11) | 113.6(3)  | O(59)-Nd(3)-O(14) | 71.96(19)  |
| O(55)-Nd(2)-O(11) | 70.9(2)   | O(35)-Nd(3)-O(36) | 60.4(2)    |
| O(32)-Nd(2)-O(5)  | 112.9(2)  | O(20)-Nd(3)-O(36) | 78.9(2)    |
| O(44)-Nd(2)-O(5)  | 133.9(2)  | O(58)-Nd(3)-O(36) | 125.1(2)   |
| O(55)-Nd(2)-O(5)  | 76.79(19) | O(47)-Nd(3)-O(36) | 112.88(18) |
| O(11)-Nd(2)-O(5)  | 65.0(2)   | O(59)-Nd(3)-O(36) | 140.87(19) |
| O(32)-Nd(2)-O(54) | 73.7(2)   | O(14)-Nd(3)-O(36) | 69.41(19)  |
| O(44)-Nd(2)-O(54) | 78.3(2)   | O(35)-Nd(3)-O(19) | 76.8(2)    |
| O(55)-Nd(2)-O(54) | 71.6(2)   | O(20)-Nd(3)-O(19) | 59.2(2)    |
| O(11)-Nd(2)-O(54) | 110.3(2)  | O(58)-Nd(3)-O(19) | 140.6(2)   |
| O(5)-Nd(2)-O(54)  | 147.5(2)  | O(47)-Nd(3)-O(19) | 68.3(2)    |
| O(32)-Nd(2)-O(43) | 107.7(2)  | O(59)-Nd(3)-O(19) | 129.1(2)   |

|                   |            |                   |            |
|-------------------|------------|-------------------|------------|
| O(14)-Nd(3)-O(19) | 111.8(2)   | O(41)-Nd(4)-O(24) | 122.2(2)   |
| O(36)-Nd(3)-O(19) | 63.18(18)  | O(26)-Nd(4)-O(24) | 65.9(2)    |
| O(35)-Nd(3)-O(13) | 68.63(18)  | O(61)-Nd(4)-O(24) | 88.1(2)    |
| O(20)-Nd(3)-O(13) | 122.02(18) | O(23)-Nd(4)-O(24) | 58.9(2)    |
| O(58)-Nd(3)-O(13) | 65.64(19)  | O(64)-Nd(4)-O(24) | 68.9(3)    |
| O(47)-Nd(3)-O(13) | 123.98(19) | O(17)-Nd(4)-O(24) | 123.9(2)   |
| O(59)-Nd(3)-O(13) | 97.54(19)  | O(42)-Nd(4)-O(24) | 149.3(2)   |
| O(14)-Nd(3)-O(13) | 58.50(19)  | O(18)-Nd(4)-O(24) | 134.53(18) |
| O(36)-Nd(3)-O(13) | 67.1(2)    | O(25)-Nd(4)-O(24) | 74.3(2)    |
| O(19)-Nd(3)-O(13) | 128.78(18) | O(52)-Zn(1)-N(1)  | 123.8(3)   |
| O(35)-Nd(3)-O(48) | 122.52(17) | O(52)-Zn(1)-O(8)  | 109.7(3)   |
| O(20)-Nd(3)-O(48) | 64.95(17)  | N(1)-Zn(1)-O(8)   | 125.7(3)   |
| O(58)-Nd(3)-O(48) | 99.83(18)  | O(52)-Zn(1)-O(2)  | 95.1(3)    |
| O(47)-Nd(3)-O(48) | 58.74(18)  | N(1)-Zn(1)-O(2)   | 89.6(4)    |
| O(59)-Nd(3)-O(48) | 64.76(18)  | O(8)-Zn(1)-O(2)   | 76.7(3)    |
| O(14)-Nd(3)-O(48) | 118.31(18) | O(52)-Zn(1)-N(3)  | 94.1(3)    |
| O(36)-Nd(3)-O(48) | 131.43(19) | N(1)-Zn(1)-N(3)   | 97.1(4)    |
| O(19)-Nd(3)-O(48) | 70.55(18)  | O(8)-Zn(1)-N(3)   | 86.8(3)    |
| O(13)-Nd(3)-O(48) | 160.67(19) | O(2)-Zn(1)-N(3)   | 163.0(3)   |
| O(41)-Nd(4)-O(26) | 64.21(19)  | O(49)-Zn(2)-O(38) | 117.6(3)   |
| O(41)-Nd(4)-O(61) | 116.5(2)   | O(49)-Zn(2)-N(14) | 103.4(4)   |
| O(26)-Nd(4)-O(61) | 143.0(3)   | O(38)-Zn(2)-N(14) | 135.4(3)   |
| O(41)-Nd(4)-O(23) | 169.8(2)   | O(49)-Zn(2)-N(10) | 97.8(4)    |
| O(26)-Nd(4)-O(23) | 110.4(2)   | O(38)-Zn(2)-N(10) | 88.5(4)    |
| O(61)-Nd(4)-O(23) | 73.2(2)    | N(14)-Zn(2)-N(10) | 103.2(5)   |
| O(41)-Nd(4)-O(64) | 72.5(3)    | O(49)-Zn(2)-O(29) | 91.9(3)    |
| O(26)-Nd(4)-O(64) | 76.0(2)    | O(38)-Zn(2)-O(29) | 76.0(4)    |
| O(61)-Nd(4)-O(64) | 70.0(3)    | N(14)-Zn(2)-O(29) | 86.4(4)    |
| O(23)-Nd(4)-O(64) | 115.5(3)   | N(10)-Zn(2)-O(29) | 164.3(4)   |
| O(41)-Nd(4)-O(17) | 112.7(2)   | O(56)-Zn(3)-O(5)  | 118.4(3)   |
| O(26)-Nd(4)-O(17) | 139.3(2)   | O(56)-Zn(3)-N(4)  | 118.0(3)   |
| O(61)-Nd(4)-O(17) | 76.8(3)    | O(5)-Zn(3)-N(4)   | 121.4(3)   |
| O(23)-Nd(4)-O(17) | 65.0(2)    | O(56)-Zn(3)-N(2)  | 97.3(3)    |
| O(64)-Nd(4)-O(17) | 144.2(2)   | O(5)-Zn(3)-N(2)   | 87.2(3)    |
| O(41)-Nd(4)-O(42) | 60.25(19)  | N(4)-Zn(3)-N(2)   | 100.6(3)   |
| O(26)-Nd(4)-O(42) | 124.4(2)   | O(56)-Zn(3)-O(11) | 90.5(2)    |
| O(61)-Nd(4)-O(42) | 67.2(2)    | O(5)-Zn(3)-O(11)  | 76.9(3)    |
| O(23)-Nd(4)-O(42) | 124.9(2)   | N(4)-Zn(3)-O(11)  | 87.8(3)    |
| O(64)-Nd(4)-O(42) | 85.0(2)    | N(2)-Zn(3)-O(11)  | 164.1(3)   |
| O(17)-Nd(4)-O(42) | 69.7(2)    | O(53)-Zn(4)-O(44) | 114.6(3)   |
| O(41)-Nd(4)-O(18) | 67.1(2)    | O(53)-Zn(4)-N(12) | 117.3(3)   |
| O(26)-Nd(4)-O(18) | 85.7(2)    | O(44)-Zn(4)-N(12) | 124.8(3)   |
| O(61)-Nd(4)-O(18) | 130.2(2)   | O(53)-Zn(4)-N(16) | 100.5(3)   |
| O(23)-Nd(4)-O(18) | 104.5(2)   | O(44)-Zn(4)-N(16) | 87.7(3)    |
| O(64)-Nd(4)-O(18) | 139.6(2)   | N(12)-Zn(4)-N(16) | 100.0(4)   |
| O(17)-Nd(4)-O(18) | 59.1(2)    | O(53)-Zn(4)-O(32) | 91.5(3)    |
| O(42)-Nd(4)-O(18) | 76.05(19)  | O(44)-Zn(4)-O(32) | 74.6(3)    |
| O(41)-Nd(4)-O(25) | 103.84(19) | N(12)-Zn(4)-O(32) | 86.5(3)    |
| O(26)-Nd(4)-O(25) | 60.6(2)    | N(16)-Zn(4)-O(32) | 161.6(3)   |
| O(61)-Nd(4)-O(25) | 139.3(2)   | O(60)-Zn(5)-N(5)  | 120.0(3)   |
| O(23)-Nd(4)-O(25) | 66.2(2)    | O(60)-Zn(5)-O(20) | 115.4(2)   |
| O(64)-Nd(4)-O(25) | 131.6(2)   | N(5)-Zn(5)-O(20)  | 123.4(3)   |
| O(17)-Nd(4)-O(25) | 83.1(2)    | O(60)-Zn(5)-O(14) | 93.4(3)    |
| O(42)-Nd(4)-O(25) | 136.4(2)   | N(5)-Zn(5)-O(14)  | 88.3(3)    |
| O(18)-Nd(4)-O(25) | 60.71(18)  | O(20)-Zn(5)-O(14) | 77.6(2)    |

|                   |          |                   |          |
|-------------------|----------|-------------------|----------|
| O(60)-Zn(5)-N(7)  | 93.7(3)  | O(62)-Zn(7)-O(17) | 113.2(3) |
| N(5)-Zn(5)-N(7)   | 100.0(3) | O(23)-Zn(7)-O(17) | 77.3(3)  |
| O(20)-Zn(5)-N(7)  | 86.8(3)  | N(8)-Zn(7)-O(17)  | 129.5(3) |
| O(14)-Zn(5)-N(7)  | 164.5(3) | O(62)-Zn(7)-N(6)  | 93.9(3)  |
| O(57)-Zn(6)-N(15) | 119.5(3) | O(23)-Zn(7)-N(6)  | 161.9(3) |
| O(57)-Zn(6)-O(35) | 115.2(2) | N(8)-Zn(7)-N(6)   | 100.2(4) |
| N(15)-Zn(6)-O(35) | 123.9(3) | O(17)-Zn(7)-N(6)  | 85.1(3)  |
| O(57)-Zn(6)-O(47) | 93.5(2)  | O(63)-Zn(8)-O(26) | 118.7(3) |
| N(15)-Zn(6)-O(47) | 88.0(3)  | O(63)-Zn(8)-N(9)  | 110.2(3) |
| O(35)-Zn(6)-O(47) | 77.2(2)  | O(26)-Zn(8)-N(9)  | 127.6(3) |
| O(57)-Zn(6)-N(11) | 93.9(3)  | O(63)-Zn(8)-N(13) | 98.7(3)  |
| N(15)-Zn(6)-N(11) | 100.0(3) | O(26)-Zn(8)-N(13) | 87.4(3)  |
| O(35)-Zn(6)-N(11) | 87.3(3)  | N(9)-Zn(8)-N(13)  | 103.4(3) |
| O(47)-Zn(6)-N(11) | 164.5(3) | O(63)-Zn(8)-O(41) | 93.4(3)  |
| O(62)-Zn(7)-O(23) | 97.0(3)  | O(26)-Zn(8)-O(41) | 74.7(2)  |
| O(62)-Zn(7)-N(8)  | 116.4(4) | N(9)-Zn(8)-O(41)  | 85.2(3)  |
| O(23)-Zn(7)-N(8)  | 87.8(3)  | N(13)-Zn(8)-O(41) | 161.6(3) |

---
